# Supplementary material for: A New Heart-Cutting Method for a Multiplex Quantitative Analysis of Steroid Hormones in Plasma Using 2D-LC/MS/MS Technique
Source: MDPI journal article supplement (doi:10.3390/molecules28031379), 2023-02-01
Supplement: s1 [file s1]

# **A New Heart-Cutting Method for a Multiplex Quantitative Analysis of Steroid Hormones in Plasma Using 2D-LC/MS/MS Technique**

**Marcela Kotasova <sup>1,\*</sup>, Ondrej Lacina <sup>2</sup>, Drahomira Springer <sup>1</sup>, Jan Sevcik <sup>1</sup>, Tomas Brutvan <sup>3</sup>, Jana Jezkova <sup>3</sup>  
and Tomas Zima <sup>1</sup>**

<sup>1</sup> Institute of Medical Biochemistry and Laboratory Diagnostics, General University Hospital, The First Faculty of Medicine of Charles University, 128 00 Prague, Czech Republic

<sup>2</sup> Department of Food Analysis and Nutrition, University of Chemistry and Technology, 16628 Prague, Czech Republic

<sup>3</sup> 3<sup>rd</sup> Department of Internal Medicine — Endocrinology and Metabolism, General University Hospital, The First Faculty of Medicine of Charles University, 12800 Prague, Czech Republic

\* Correspondence: marcela.kotasova@vfn.cz

\* Corresponding author. Email address: marcela.kotasova@vfn.cz (M. Kotasová)

Supporting information includes 5 tables, 3 figures, and 7 pages.

Table S1. Mobile phase gradients used in the 1st dimension column (a) and in the 2nd dimension column (b) for the steroid hormones method.

| a)           |        |        |               | b)         |       |       |               |
|--------------|--------|--------|---------------|------------|-------|-------|---------------|
| HILIC Column |        |        |               | RP Column  |       |       |               |
| Time (min)   | A1 (%) | B1 (%) | Flow (mL/min) | Time (min) | A (%) | B (%) | Flow (mL/min) |
| 0.00         | 10     | 90     | 0.3           | 0.00       | 90    | 10    | 0.5           |
| 2.00         | 10     | 90     | 0.3           | 0.80       | 90    | 10    | 0.5           |
| 2.10         | 80     | 20     | 0.4           | 0.83       | 100   | 0     | 2.0           |
| 7.00         | 80     | 20     | 0.4           | 1.31       | 100   | 0     | 2.0           |
| 7.10         | 0      | 100    | 0.45          | 1.34       | 100   | 0     | 0.5           |
| 13.00        | 0      | 100    | 0.45          | 1.50       | 55    | 45    | 0.5           |
| 13.10        | 50     | 50     | 0.3           | 10.00      | 45    | 55    | 0.5           |
| 14.50        | 50     | 50     | 0.3           | 14.00      | 0     | 100   | 0.5           |
| 14.60        | 10     | 90     | 0.3           | 16.00      | 0     | 100   | 0.7           |
|              |        |        |               | 16.10      | 90    | 10    | 0.5           |

Table S2. Valve position during analysis for steroid hormones method.

| Valve 1    |          | Valve 2    |          |
|------------|----------|------------|----------|
| Time (min) | Position | Time (min) | Position |
| 0.00       | 2A       | 0.00       | 2A       |
| 0.80       | 1B       | 0.80       | 1B       |
| 1.35       | 2A       | 1.35       | 2A       |
| 2.90       | 1B       |            |          |
| 17.00      | 2A       |            |          |

Table S3. Mobile phase gradients used in the 1st dimension column (a) and in the 2nd dimension column (b) for estradiol independent analytical run (IAR).

| a)           |        |        |               | b)         |       |       |               |
|--------------|--------|--------|---------------|------------|-------|-------|---------------|
| HILIC Column |        |        |               | RP Column  |       |       |               |
| Time (min)   | A1 (%) | B1 (%) | Flow (mL/min) | Time (min) | A (%) | B (%) | Flow (mL/min) |
| 0.00         | 10     | 90     | 0.3           | 0.00       | 90    | 10    | 0.5           |
| 1.50         | 10     | 90     | 0.3           | 0.80       | 90    | 10    | 0.5           |
| 1.60         | 80     | 20     | 0.4           | 0.83       | 100   | 0     | 2.0           |
| 2.50         | 80     | 20     | 0.4           | 1.32       | 100   | 0     | 2.0           |
| 2.60         | 0      | 100    | 0.4           | 1.35       | 100   | 0     | 0.5           |
| 6.00         | 0      | 100    | 0.4           | 1.40       | 30    | 70    | 0.5           |
| 6.10         | 50     | 50     | 0.4           | 6.00       | 0     | 100   | 0.5           |
| 6.50         | 50     | 50     | 0.4           | 8.00       | 0     | 100   | 0.6           |
| 6.60         | 10     | 90     | 0.4           | 8.10       | 90    | 10    | 0.6           |

Figure S1. Gradients and flow rates of the two-dimensional method for estradiol IAR.

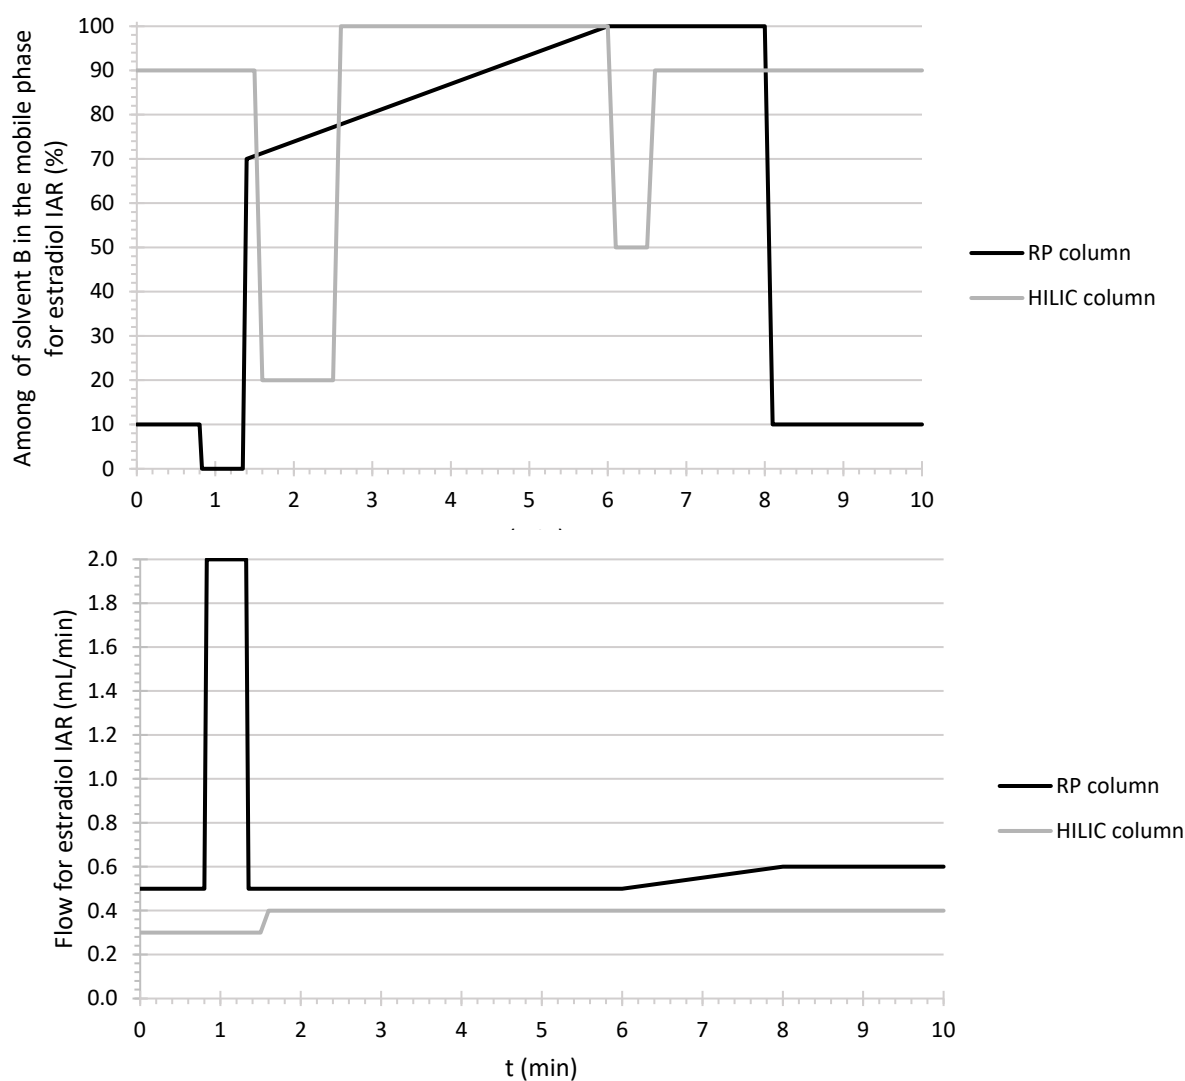

Table S4. Valve position during analysis for estradiol IAR.

| Valve 1    |          | Valve 2    |          |
|------------|----------|------------|----------|
| Time (min) | Position | Time (min) | Position |
| 0.00       | 2A       | 0.00       | 2A       |
| 0.80       | 1B       | 0.80       | 1B       |
| 1.35       | 2A       | 1.35       | 2A       |
| 2.00       | 1B       |            |          |
| 9.00       | 2A       |            |          |

Figure S2. Valve position during analysis for estradiol IAR.

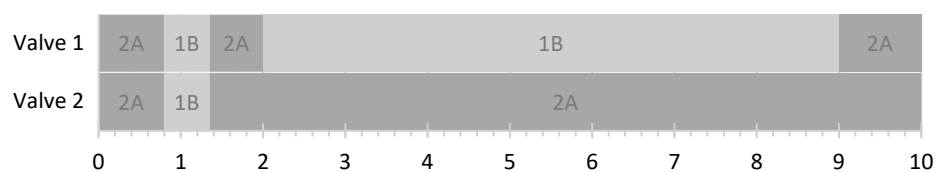

Figure S3. Settings of valves position and flow of mobile phases in position (a) Valve 1-1B/Valve 2-1B -sample is injected to system into extraction column, analytes are separated from matrix and retained at TRAP, (b) Valve 1-2A/Valve 2-2A - analytes are eluted to analytical column (RP) and analyzed in MS system, (c) Valve 1-1B/Valve 2-2A - analytes is running and trap is washing out from the opposite side.

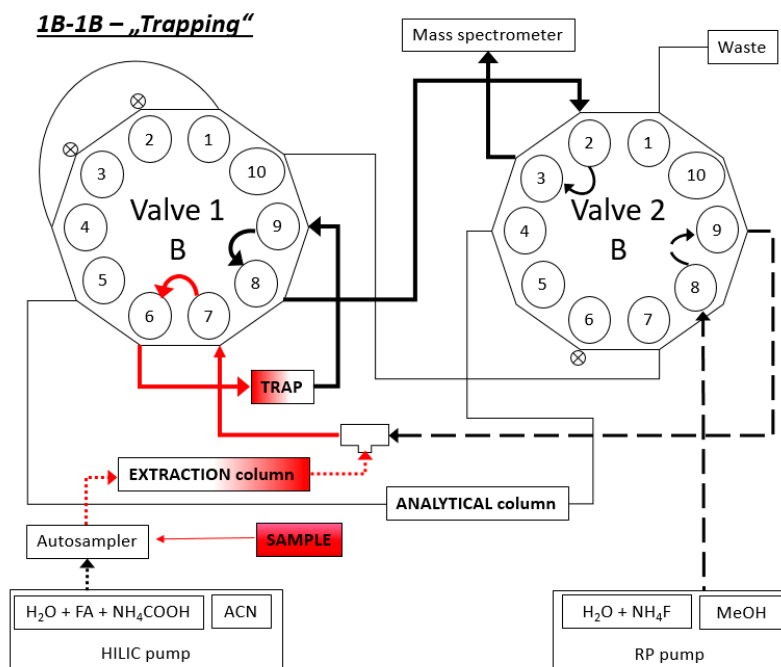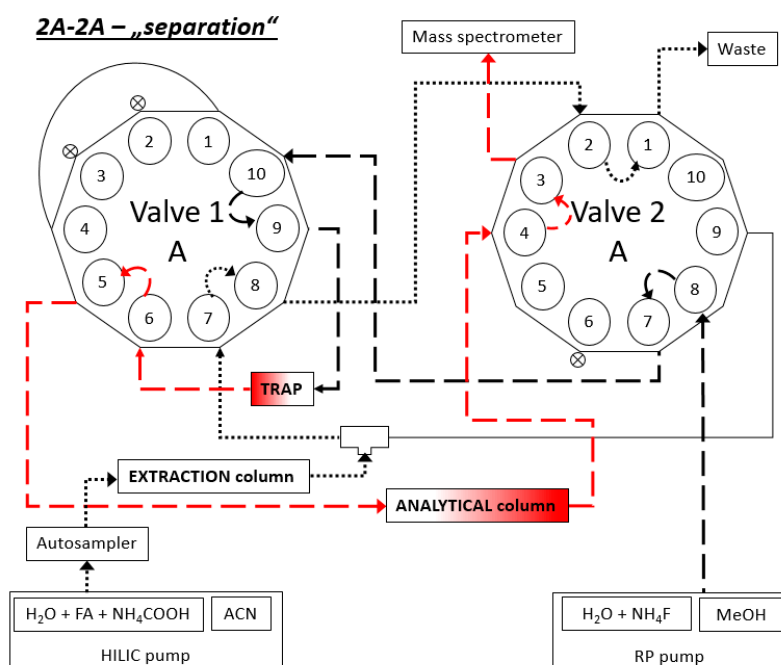

**1B-2A – „washing“**

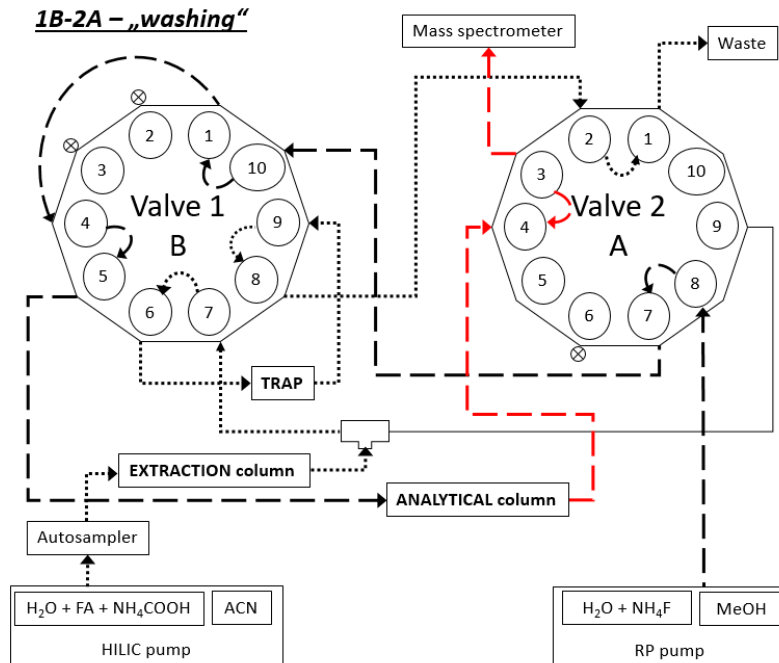

Table S5. Mass transmission, MRM condition, and retention time for each hormone and their label internal standard.

| Compound Name                        | Precursor Ion (m/z) | Product Ion (m/z) | Fragmentor (V) | Cell voltage (V) | Retention Time (min) |
|--------------------------------------|---------------------|-------------------|----------------|------------------|----------------------|
| 11-deoxycorticosterone               | 331.2               | 109.1             | 102            | 28               | 12.4                 |
| 11-deoxycorticosterone-D8            | 339.3               | 113.1             | 126            | 24               | 12.3                 |
| 11-deoxycortisol                     | 347.2               | 97.1              | 129            | 32               | 10.6                 |
| 11-deoxycortisol-D5                  | 352                 | 100.1             | 141            | 28               | 10.5                 |
| 17 $\alpha$ -hydroxyprogesterone     | 331.2               | 109.1             | 121            | 31               | 12.8                 |
| 17 $\alpha$ -hydroxyprogesteron-13C3 | 334.2               | 100.1             | 117            | 28               | 12.9                 |
| 21-deoxycortisol                     | 347.2               | 121.1             | 123            | 16               | 9.5                  |
| 21-deoxycortisol-D8                  | 355.2               | 125.0             | 132            | 16               | 9.4                  |
| Aldosterone                          | 361.2               | 343.2             | 132            | 20               | 6.1                  |
| Aldosterone-D4                       | 365.2               | 346.2             | 140            | 20               | 6.1                  |
| Androstenedione                      | 287.2               | 97.1              | 135            | 28               | 11.8                 |
| Androstenedione-13C3                 | 290.2               | 100.1             | 123            | 24               | 11.8                 |
| Corticosterone                       | 347.2               | 121.1             | 141            | 16               | 10.2                 |
| Corticosterone-D8                    | 355.2               | 125.0             | 168            | 16               | 10.0                 |
| Cortisol                             | 363.2               | 121.1             | 135            | 24               | 7.8                  |
| Cortisol-D4                          | 367.2               | 121.1             | 141            | 28               | 7.8                  |
| Cortisone                            | 361.2               | 163.1             | 144            | 28               | 6.9                  |
| Cortisone-D8                         | 369.2               | 168               | 111            | 26               | 6.9                  |
| DHEA                                 | 289.1               | 213.1             | 95             | 12               | 12.8                 |
| DHEA-D5                              | 294.1               | 218.1             | 95             | 16               | 12.8                 |
| DHEAS                                | 367.2               | 96.9              | 165            | 60               | 8.3                  |
| DHEAS-D6                             | 373.2               | 97.0              | 165            | 60               | 8.3                  |
| Dihydrotestosterone                  | 291.2               | 255.1             | 120            | 16               | 13.4                 |
| Dihydrotestosterone-D3               | 294.1               | 258.1             | 123            | 16               | 13.4                 |
| Estradiol                            | 271.2               | 183.1             | 165            | 48               | 12.5                 |
| Estradiol- D5                        | 276.2               | 187.0             | 168            | 52               | 12.2                 |
| Estradiol IAR                        | 271.2               | 183.1             | 165            | 48               | 4.0                  |
| Estradiol- D5 IAR                    | 276.2               | 187.0             | 168            | 52               | 4.0                  |
| Progesterone                         | 315.2               | 109.1             | 112            | 28               | 13.7                 |
| Progesterone-13C3                    | 318.3               | 112.1             | 110            | 28               | 13.7                 |
| Testosterone                         | 289.2               | 97.1              | 121            | 25               | 12.5                 |
| Testosterone-D3                      | 292.1               | 97.1              | 121            | 28               | 12.5                 |
